# Supplementary material for: Is antiplatelet treatment effective at attenuating the progression of white matter hyperintensities?
Source: PubMed Central journal article supplement (PMC5398663; doi:10.1371/journal.pone.0176300), 2017-04-20
Supplement: pone.0176300.s001.pdf [file pone.0176300.s001.pdf]

| No | Age | Sex    | Group | HTN | DM  | Lipid | Sm  | Base DWM | Base PVWM | Base Total | F/U DWM  | F/U PVWM | F/U Total | MRI interval (days) |
|----|-----|--------|-------|-----|-----|-------|-----|----------|-----------|------------|----------|----------|-----------|---------------------|
| 1  | 66  | Female | AG    | No  | No  | No    | No  | 2751.49  | 3755.53   | 6507.02    | 4662.99  | 5066.22  | 9729.21   | 1765                |
| 2  | 51  | Female | AG    | No  | No  | No    | No  | 638.77   | 450.26    | 1089.03    | 651.8    | 654      | 1305.8    | 2159                |
| 3  | 50  | Male   | NAG   | No  | No  | No    | No  | 243.53   | 371.7     | 615.23     | 294.69   | 1725.49  | 2020.18   | 1730                |
| 4  | 52  | Female | AG    | Yes | No  | No    | No  | 14976.24 | 14457.93  | 29434.17   | 20366.71 | 46060.85 | 66427.6   | 1922                |
| 5  | 68  | Female | AG    | No  | No  | No    | No  | 5787.73  | 1438.5    | 7226.23    | 6091.61  | 4967.12  | 11058.7   | 1880                |
| 6  | 66  | Male   | AG    | Yes | No  | No    | No  | 232.64   | 2067.87   | 2300.51    | 333.26   | 2140.53  | 2473.79   | 1719                |
| 7  | 57  | Female | AG    | No  | No  | No    | No  | 243.53   | 986.93    | 1230.46    | 909.93   | 2737.55  | 3647.48   | 1982                |
| 8  | 68  | Male   | AG    | Yes | Yes | No    | No  | 906.6    | 2967.83   | 3874.43    | 2714.05  | 3489.5   | 6203.55   | 1733                |
| 9  | 57  | Female | AG    | No  | No  | Yes   | No  | 261.08   | 1546.61   | 1807.69    | 444.33   | 1844.39  | 2288.72   | 1692                |
| 10 | 72  | Female | AG    | No  | No  | No    | No  | 589.34   | 2871.08   | 3460.42    | 1452.63  | 3396.48  | 4849.11   | 2094                |
| 11 | 52  | Female | AG    | Yes | No  | No    | No  | 111.08   | 2473.71   | 2584.79    | 458.84   | 3139.4   | 3598.24   | 1869                |
| 12 | 63  | Female | NAG   | No  | No  | No    | No  | 138.15   | 869.16    | 1007.31    | 299.58   | 884.01   | 1183.59   | 2051                |
| 13 | 61  | Male   | AG    | No  | No  | No    | No  | 2809.62  | 863.84    | 3673.46    | 3908.26  | 1034.59  | 4942.85   | 1888                |
| 14 | 62  | Female | AG    | No  | No  | No    | No  | 149.53   | 1773.04   | 1922.57    | 158.98   | 1856.16  | 2015.14   | 1763                |
| 15 | 70  | Female | NAG   | Yes | Yes | No    | No  | 203.19   | 468.83    | 672.02     | 350.27   | 536.39   | 886.66    | 1741                |
| 16 | 62  | Male   | AG    | Yes | No  | No    | No  | 1597.61  | 5502.36   | 7099.97    | 4476.9   | 16749.61 | 21226.5   | 1890                |
| 17 | 55  | Male   | NAG   | No  | No  | No    | Yes | 896.19   | 1483.79   | 2379.98    | 1406.16  | 1809.4   | 3215.56   | 2044                |
| 18 | 50  | Male   | AG    | No  | No  | No    | No  | 718.44   | 1599.38   | 2317.82    | 1560.42  | 1702.98  | 3263.4    | 1729                |
| 19 | 58  | Male   | NAG   | No  | No  | No    | Yes | 575.36   | 1391.17   | 1966.53    | 610.2    | 1483.79  | 2093.99   | 1824                |
| 20 | 88  | Female | NAG   | No  | No  | No    | No  | 171.34   | 565.41    | 736.75     | 175.43   | 600.97   | 776.4     | 1777                |
| 21 | 57  | Female | NAG   | No  | No  | Yes   | No  | 1013.26  | 2006.83   | 3020.09    | 1144.92  | 2719.26  | 3864.18   | 1854                |
| 22 | 56  | Female | NAG   | No  | No  | No    | No  | 171.34   | 1884.15   | 2055.49    | 780.63   | 1978.86  | 2759.49   | 1821                |
| 23 | 68  | Female | NAG   | No  | No  | No    | No  | 427.25   | 1298.85   | 1726.1     | 1245.96  | 2583.68  | 3829.64   | 1757                |
| 24 | 53  | Female | NAG   | No  | No  | No    | No  | 31.91    | 317.32    | 349.23     | 62.04    | 449.6    | 511.64    | 1860                |
| 25 | 53  | Female | AG    | No  | No  | No    | No  | 384.53   | 495.61    | 880.14     | 396.45   | 1075.3   | 1471.75   | 1756                |
| 26 | 60  | Female | AG    | No  | No  | No    | No  | 2035.68  | 1408.82   | 3444.5     | 4512.46  | 3974.86  | 8487.32   | 2038                |
| 27 | 68  | Female | AG    | No  | No  | No    | No  | 4567.3   | 3994.79   | 8562.09    | 4588.84  | 4443.55  | 9032.39   | 1637                |
| 28 | 57  | Female | AG    | Yes | No  | No    | No  | 346.37   | 2004.59   | 2350.96    | 826.68   | 3406.87  | 4233.55   | 1795                |

|    |    |        |     |     |     |     |     |          |         |          |          |         |         |      |
|----|----|--------|-----|-----|-----|-----|-----|----------|---------|----------|----------|---------|---------|------|
| 29 | 52 | Female | AG  | No  | No  | No  | No  | 29.91    | 264.89  | 294.8    | 155.09   | 496.29  | 651.38  | 1951 |
| 30 | 61 | Female | AG  | Yes | No  | No  | No  | 3081.71  | 1615.65 | 4697.36  | 5919.2   | 2817.44 | 8736.64 | 2028 |
| 31 | 63 | Male   | NAG | No  | No  | No  | No  | 1966.11  | 7509.7  | 9475.81  | 7026.06  | 7919.18 | 14945.2 | 2019 |
| 32 | 53 | Male   | AG  | Yes | Yes | Yes | No  | 145.8    | 969.12  | 1114.92  | 218.43   | 1468.26 | 1686.69 | 1925 |
| 33 | 51 | Female | NAG | No  | No  | No  | No  | 51.27    | 0       | 51.27    | 117.14   | 0       | 117.14  | 1818 |
| 34 | 56 | Female | NAG | No  | No  | No  | No  | 89.72    | 620.39  | 710.11   | 100.81   | 881.84  | 982.65  | 1740 |
| 35 | 55 | Female | NAG | No  | No  | No  | No  | 1793.87  | 4887.31 | 6681.18  | 2034.25  | 6296.62 | 8330.87 | 1952 |
| 36 | 59 | Female | AG  | No  | No  | No  | No  | 12074.59 | 7052.42 | 19127.01 | 22963.32 | 9925.61 | 32888.9 | 2022 |
| 37 | 54 | Male   | AG  | Yes | No  | No  | No  | 128.18   | 316.17  | 444.35   | 413.6    | 567.41  | 981.01  | 1751 |
| 38 | 57 | Female | AG  | Yes | Yes | Yes | No  | 662.84   | 1654.96 | 2317.8   | 1171.9   | 1987.48 | 3159.38 | 2210 |
| 39 | 64 | Female | AG  | No  | No  | No  | No  | 158.08   | 328.98  | 487.06   | 289.85   | 525.13  | 814.98  | 1761 |
| 40 | 52 | Male   | AG  | Yes | Yes | No  | Yes | 196.54   | 534.06  | 730.6    | 289.17   | 679.33  | 968.5   | 1763 |
| 41 | 56 | Male   | AG  | No  | No  | No  | No  | 367.43   | 1867.05 | 2234.48  | 448.64   | 1908.63 | 2357.27 | 2050 |
| 42 | 76 | Female | AG  | No  | No  | No  | No  | 2144.81  | 3877.65 | 6022.46  | 2708.87  | 4363.14 | 7072.01 | 1763 |
| 43 | 60 | Male   | AG  | Yes | No  | No  | No  | 414.84   | 2626.17 | 3041.01  | 723.75   | 2984.31 | 3708.06 | 2112 |
| 44 | 47 | Female | NAG | No  | No  | No  | No  | 115.54   | 350.91  | 466.45   | 542.82   | 542.82  | 1085.64 | 1741 |
| 45 | 62 | Female | AG  | Yes | No  | Yes | No  | 153.81   | 657.96  | 811.77   | 473.05   | 753.52  | 1226.57 | 2017 |
| 46 | 58 | Female | AG  | Yes | No  | Yes | No  | 427.63   | 880.93  | 1308.56  | 651.39   | 1245.91 | 1897.3  | 2140 |
| 47 | 59 | Male   | AG  | No  | No  | No  | Yes | 289.17   | 1661.17 | 1950.34  | 816.8    | 3070.75 | 3887.55 | 1812 |
| 48 | 53 | Female | NAG | No  | No  | No  | No  | 418.64   | 2542.06 | 2960.7   | 434.9    | 3158.98 | 3593.88 | 1961 |
| 49 | 68 | Male   | NAG | No  | No  | No  | No  | 243.53   | 337.53  | 581.06   | 351.56   | 1523.85 | 1875.41 | 1780 |
| 50 | 63 | Female | NAG | Yes | Yes | No  | No  | 325.36   | 1320.73 | 1646.09  | 425.89   | 1587.12 | 2013.01 | 1758 |
| 51 | 61 | Female | AG  | No  | No  | No  | No  | 465.7    | 679.33  | 1145.03  | 565.44   | 726.67  | 1292.11 | 1749 |
| 52 | 64 | Female | NAG | Yes | Yes | No  | No  | 0        | 2371.18 | 2371.18  | 2155.86  | 2648.3  | 4804.16 | 1974 |
| 53 | 62 | Male   | AG  | No  | No  | No  | No  | 205.83   | 1213.54 | 1419.37  | 303.73   | 2188.18 | 2491.91 | 2137 |
| 54 | 60 | Female | NAG | No  | No  | No  | No  | 1482.8   | 1229.95 | 2712.75  | 1761.27  | 1666.92 | 3428.19 | 2326 |
| 55 | 51 | Male   | AG  | No  | No  | No  | No  | 68.36    | 0       | 68.36    | 98.23    | 0       | 98.23   | 1777 |
| 56 | 62 | Female | NAG | No  | No  | No  | No  | 256.36   | 367.45  | 623.81   | 1523.85  | 2727.16 | 4251.01 | 2029 |
| 57 | 58 | Male   | AG  | Yes | Yes | No  | Yes | 1726.17  | 3478.04 | 5204.21  | 1909.92  | 3636.31 | 5546.23 | 2093 |

|    |    |        |     |     |     |     |    |         |         |          |          |          |         |      |
|----|----|--------|-----|-----|-----|-----|----|---------|---------|----------|----------|----------|---------|------|
| 58 | 66 | Male   | NAG | Yes | No  | Yes | No | 987.4   | 2994.98 | 3982.38  | 1516.72  | 4368.35  | 5885.07 | 2089 |
| 59 | 54 | Male   | NAG | Yes | No  | No  | No | 646.39  | 598.14  | 1244.53  | 670.77   | 708.96   | 1379.73 | 2124 |
| 60 | 63 | Male   | AG  | No  | No  | No  | No | 1184.54 | 4105.8  | 5290.34  | 1491.08  | 5002.72  | 6493.8  | 1877 |
| 61 | 64 | Male   | NAG | No  | No  | No  | No | 538.33  | 837.41  | 1375.74  | 942.03   | 985.25   | 1927.28 | 1790 |
| 62 | 67 | Female | NAG | No  | No  | No  | No | 666.49  | 1332.97 | 1999.46  | 970.77   | 1482.8   | 2453.57 | 2274 |
| 63 | 50 | Male   | AG  | No  | No  | No  | No | 7610.12 | 4666.06 | 12276.18 | 11538.61 | 11936.67 | 23475.3 | 2099 |
| 64 | 67 | Female | NAG | No  | No  | No  | No | 1431.28 | 3699.97 | 5131.25  | 4999.08  | 6498.29  | 11497.4 | 1403 |
| 65 | 61 | Female | NAG | No  | No  | No  | No | 511.8   | 1846.46 | 2358.26  | 525.73   | 2243.67  | 2769.4  | 2146 |
| 66 | 68 | Female | NAG | No  | No  | No  | No | 30.02   | 497.42  | 527.44   | 45.14    | 513.45   | 558.59  | 1773 |
| 67 | 55 | Female | AG  | No  | No  | No  | No | 91.77   | 990.19  | 1081.96  | 102.33   | 1138.41  | 1240.74 | 1785 |
| 68 | 64 | Female | NAG | No  | No  | No  | No | 448.61  | 1691.89 | 2140.5   | 621.81   | 2362.52  | 2984.33 | 2005 |
| 69 | 64 | Female | AG  | Yes | No  | No  | No | 1174.93 | 1038.22 | 2213.15  | 10201.63 | 4810.65  | 15012.3 | 1791 |
| 70 | 53 | Female | NAG | No  | No  | No  | No | 166.62  | 0       | 166.62   | 284.64   | 0        | 284.64  | 1788 |
| 71 | 61 | Male   | AG  | No  | No  | No  | No | 139.58  | 1426.85 | 1566.43  | 432.61   | 1507.72  | 1940.33 | 1888 |
| 72 | 63 | Female | AG  | No  | No  | No  | No | 427.24  | 1465.44 | 1892.68  | 1314.47  | 1572.97  | 2887.44 | 2117 |
| 73 | 59 | Female | AG  | Yes | No  | Yes | No | 902.32  | 1064.82 | 1967.14  | 953.17   | 1139.98  | 2093.15 | 2128 |
| 74 | 69 | Female | AG  | No  | No  | No  | No | 210.93  | 1915.21 | 2126.14  | 2834.46  | 5173.89  | 8008.35 | 1769 |
| 75 | 67 | Female | AG  | No  | No  | No  | No | 166.73  | 1057.25 | 1223.98  | 666.49   | 1332.97  | 1999.46 | 2076 |
| 76 | 58 | Female | NAG | No  | No  | No  | No | 287.68  | 953.2   | 1240.88  | 418.75   | 1385.5   | 1804.25 | 2088 |
| 77 | 62 | Male   | AG  | Yes | Yes | No  | No | 206.79  | 661.74  | 868.53   | 222.73   | 1319.26  | 1541.99 | 1917 |
| 78 | 58 | Female | NAG | No  | No  | No  | No | 81.18   | 739.14  | 820.32   | 459.76   | 1964.44  | 2424.2  | 1788 |
| 79 | 77 | Female | AG  | No  | No  | No  | No | 76.9    | 1174.93 | 1251.83  | 129.08   | 1519.88  | 1648.96 | 1777 |
| 80 | 55 | Female | AG  | No  | No  | No  | No | 149.67  | 542.03  | 691.7    | 155.09   | 543.1    | 698.19  | 1762 |
| 81 | 65 | Male   | NAG | No  | No  | No  | No | 21.36   | 0       | 21.36    | 62.04    | 211.96   | 274     | 1786 |
| 82 | 84 | Female | NAG | No  | No  | No  | No | 86.15   | 4001.82 | 4087.97  | 713.43   | 4379.11  | 5092.54 | 1757 |
| 83 | 57 | Male   | AG  | No  | No  | No  | No | 1679.78 | 970.25  | 2650.03  | 1743.59  | 1611.76  | 3355.35 | 1792 |
| 84 | 64 | Female | AG  | No  | No  | No  | No | 261.57  | 966.12  | 1227.69  | 270      | 994.83   | 1264.83 | 2180 |
| 85 | 66 | Female | AG  | No  | No  | No  | No | 645.56  | 1584.18 | 2229.74  | 1121.15  | 2438.45  | 3559.6  | 1804 |
| 86 | 68 | Male   | AG  | Yes | Yes | No  | No | 2247.28 | 13560.6 | 15807.88 | 6937.69  | 22239.88 | 29177.6 | 2110 |

|    |    |        |     |     |     |    |    |         |         |         |         |          |         |      |
|----|----|--------|-----|-----|-----|----|----|---------|---------|---------|---------|----------|---------|------|
| 87 | 69 | Male   | NAG | No  | No  | No | No | 697.04  | 2026.98 | 2724.02 | 754.29  | 2046.71  | 2801    | 1792 |
| 88 | 69 | Male   | AG  | Yes | Yes | No | No | 321.26  | 843.83  | 1165.09 | 1553.58 | 2237.31  | 3790.89 | 1780 |
| 89 | 50 | Female | NAG | Yes | No  | No | No | 346.37  | 1520.57 | 1866.94 | 462.6   | 3406.87  | 3869.47 | 1860 |
| 90 | 59 | Male   | AG  | Yes | Yes | No | No | 2031.71 | 4487.35 | 6519.06 | 6787.96 | 19790.04 | 26578   | 1774 |
| 91 | 63 | Female | NAG | No  | No  | No | No | 188.07  | 315.35  | 503.42  | 227.46  | 367.59   | 595.05  | 2267 |
| 92 | 51 | Male   | NAG | No  | No  | No | No | 189.54  | 1412.91 | 1602.45 | 392.89  | 3618.71  | 4011.6  | 1921 |
| 93 | 51 | Female | NAG | No  | No  | No | No | 155.09  | 144.75  | 299.84  | 253.32  | 268.82   | 522.14  | 1926 |
